# Supplementary material
Source: PubMed Central journal article supplement (PMC7450395)
Supplement: NIHMS1607868-supplement-Supplemental_Data_File__doc__pdf__etc__.pdf [file NIHMS1607868-supplement-Supplemental_Data_File__doc__pdf__etc__.pdf]

# Depression Preceding and Following a Diagnosis of Pancreatic Cancer

## *Results From a National, Population-Based Study*

### SUPPLEMENTAL DIGITAL CONTENT

**SUPPLEMENTARY TABLE 1.** Pancreatic Cancer SNOMED Terms and ICD 10 Codes

| SNOMED Term                                            | SNOMED Code | ICD 10 Code                                                                                                            |
|--------------------------------------------------------|-------------|------------------------------------------------------------------------------------------------------------------------|
| Pancreatic cancer                                      |             |                                                                                                                        |
| Malignant tumor of pancreas                            | 363419009   | C25                                                                                                                    |
| Adenocarcinoma of pancreas                             | 700423003   | C25.9                                                                                                                  |
| Local recurrence of malignant tumor of pancreas        | 314964006   | C25.2 C25.8 C25.7 C25.4 C25.3 C25.1 C25.0 C25.9                                                                        |
| Malignant neoplasm of ectopic pancreatic tissue        | 187798008   | C25.9                                                                                                                  |
| Malignant tumor of body of pancreas                    | 187791002   | C25.1                                                                                                                  |
| Malignant tumor of endocrine pancreas                  | 254611009   | C25.4                                                                                                                  |
| Malignant tumor of exocrine pancreas                   | 255088001   | –                                                                                                                      |
| Malignant tumor of head of pancreas                    | 363419009   | C25.0                                                                                                                  |
| Malignant tumor of tail of pancreas                    | 187792009   | C25.2                                                                                                                  |
| Primary malignant neoplasm of pancreas                 | 372003004   | C25.7 C25.0 C25.9 C25.8 C25.4 C25.2 C25.1 C25.3                                                                        |
| Secondary malignant neoplasm of pancreas               | 94459006    | C78.8                                                                                                                  |
| Depression                                             |             |                                                                                                                        |
| Depressive disorder                                    | 35489007    | F03X F33.1 F20.4 F06.3 F32.0 F53.0 F33.3 F32.8 F44.8 F32.3 F32.2 F33.4 F33.0 F33.9 F32.9 F34.1 F32.1 F33.8 F41.2 F33.2 |
| Acute depression                                       | 712823008   | F32.9                                                                                                                  |
| Agitated depression                                    | 83458005    | F32.2                                                                                                                  |
| Atypical depressive disorder                           | 191659001   | F32.8                                                                                                                  |
| Bipolar affective disorder, current episode depression | 191627008   | F31.31                                                                                                                 |
| Chronic depression                                     | 192080009   | F32.8                                                                                                                  |
| Chronic depressive personality disorder                | 442057004   | F33.4 F33.8 F33.9 F33.1 F33.2 F33.0 F33.3                                                                              |
| Cotard's syndrome                                      | 357705009   | F22.0                                                                                                                  |
| Depressive conduct disorder                            | 231542000   | F92.0                                                                                                                  |

*Continued on next page*

---

**SUPPLEMENTARY TABLE 1.** *(Continued)*

---

| <b>SNOMED Term</b>               | <b>SNOMED Code</b> | <b>ICD 10 Code</b>                                                                  |
|----------------------------------|--------------------|-------------------------------------------------------------------------------------|
| Depressive disorder in remission | 698957003          | F33.0 F32.8 F32.3 F32.9 F33.3 F33.2<br>F33.9 F32.1 F33.8 F33.4 F32.0 F32.2<br>F33.1 |
| Drug-induced depressive state    | 191495003          | F14.8 F10.8 F16.8 F15.8 F17.8 F18.8<br>F19.8 F12.8 F13.8 F11.8                      |
| Dysthymia                        | 78667006           | F34.1                                                                               |
| Endogenous depression            | 300706003          | F33.3 F33.2                                                                         |
| Major depressive disorder        | 370143000          | F32.2                                                                               |
| Masked depression                | 231500002          | F32.8                                                                               |
| Menopausal depression            | 84788008           | F32.8                                                                               |
| Mild depression                  | 310495003          | F32.0                                                                               |
| Minimal depression               | 718636001          | F32.8                                                                               |

---
